# Supplementary material for: Synergistic effect of genetic polymorphisms in TLR6 and TLR10 genes on the risk of pulmonary tuberculosis in a Moldavian population
Source: PubMed Central journal article supplement — Innate Immun. 2021 Jul 18;27(5):365–76. doi: 10.1177/17534259211029996 (PMC8419295; doi:10.1177/17534259211029996), 2021-07-18
Supplement: sj-pdf-1-ini-10.1177_17534259211029996.pdf [file sj-pdf-1-ini-10.1177_17534259211029996.pdf]

**Supplemental Table S1.** Polymorphisms investigated with traditional gel-based and Sanger sequencing methods.

| Polymorphism            | Genotyping methods                    | Primer                                                                                                                | Enzyme                | Ref.                 |
|-------------------------|---------------------------------------|-----------------------------------------------------------------------------------------------------------------------|-----------------------|----------------------|
| <i>TLRI0</i> rs11096957 | PCR-RFLP, agarose gel electrophoresis | F: CCTTACCACCAAAGTCACATTTTC<br>R: GCCTGCCCATCTTAAACACAAC                                                              | <i>Nla</i> III        | This study           |
| <i>IFNG</i> rs2430561   | PCR-SSPs, agarose gel electrophoresis | R (Generic): TCAACAAAGCTGATACTCCA<br>F (allele T): TTCTTACAACACAAAATCAAATCT<br>F (allele A): TTCTTACAACACAAAATCAAATCA | -                     | Pravica et al. 2000  |
| <i>TLRI</i> rs5743618   | PCR-RFLP, agarose gel electrophoresis | F: GGAAAGTTATAGAGGAACCCT<br>R: CTTCACCCAGAAAGAATCGTGCC                                                                | <i>A</i> h <i>u</i> I | Leoratti et al. 2008 |
| <i>TLR2</i> rs111200466 | PCR, agarose gel electrophoresis      | F: CACGGAGGCAGCGAGAAA<br>R: CTGGGCCGTGCAAAGAAG                                                                        | -                     | Tahara et al. 2007   |
| <i>TNF</i> rs1800629    | Sanger sequencing                     | F: CTTTCTGAAGCCCCTCCCAG<br>R: AGGATACCCCTCACACTCCC                                                                    | -                     | This study           |
| <i>TLR6</i> rs5743810   | Sanger sequencing                     | F: AGTAAAATCTTCTTCACGAATGCTT<br>R: CCTTCACCTTGTTTTTCACCCA                                                             | -                     | This study           |

PCR-RFLP - polymerase chain reaction – restriction fragment length polymorphism; PCR-SSPs - polymerase chain reaction with sequence-specific primers.

References:

1. Pravica V, Perrey C, Stevens A, Lee JH, Hutchinson IV. A single nucleotide polymorphism in the first intron of the human IFN-g gene: absolute correlation with a polymorphic CA microsatellite marker of high IFN-g production. *Hum Immunol* 2000;61:863 – 6.
2. Leoratti FM, Farias L, Alves FP, Suarez-Mútiis MC, Coura JR, Kalil J, Camargo EP, Moraes SL, Ramasawmy R. Variants in the toll-like receptor signaling pathway and clinical outcomes of malaria. *J Infect Dis.* 2008;198(5):772-80.
3. Tahara T, Arisawa T, Wang F, Shibata T, Nakamura M, Sakata M, Hirata I, Nakano H. Toll-like receptor 2 -196 to 174del polymorphism influences the susceptibility of Japanese people to gastric cancer. *Cancer Sci.* 2007;98(11):1790-4.
