# Supplementary material for: Synergistic effect of genetic polymorphisms in TLR6 and TLR10 genes on the risk of pulmonary tuberculosis in a Moldavian population
Source: PubMed Central journal article supplement — Innate Immun. 2021 Jul 18;27(5):365–76. doi: 10.1177/17534259211029996 (PMC8419295; doi:10.1177/17534259211029996), 2021-07-18
Supplement: sj-pdf-2-ini-10.1177_17534259211029996.pdf [file sj-pdf-2-ini-10.1177_17534259211029996.pdf]

**Supplemental Table S2.** Genotype distribution of the studied polymorphisms.

| Gene           | Polymorphism | Genotype                      | Controls, <i>n</i> (%)               | HWE <i>P</i> value | Cases, <i>n</i> (%)                   | HWE <i>P</i> value | Genotype ratio/ Call rate (%) |
|----------------|--------------|-------------------------------|--------------------------------------|--------------------|---------------------------------------|--------------------|-------------------------------|
| Both sexes     |              |                               |                                      |                    |                                       |                    |                               |
| <i>VDR</i>     | rs7975232    | A/A<br>C/A<br>C/C             | 52 (21.6)<br>128 (53.1)<br>61 (25.3) | 0.37               | 65 (24.3)<br>142 (53.2)<br>60 (22.5)  | 0.33               | 97.1                          |
| <i>VDR</i>     | rs1544410    | T/T<br>C/T<br>C/C             | 34 (13.8)<br>119 (48.2)<br>94 (38.1) | 0.79               | 40 (14.9)<br>121 (45.0)<br>108 (40.1) | 0.52               | 98.7                          |
| <i>VDR</i>     | rs2228570    | G/G<br>G/A<br>A/A             | 74 (30.4)<br>125 (51.4)<br>44 (18.1) | 0.52               | 100 (37.9)<br>117 (44.3)<br>47 (17.8) | 0.25               | 96.9                          |
| <i>MRI</i>     | rs1052632    | G/G<br>G/A<br>A/A             | 123 (54.2)<br>85 (37.4)<br>19 (8.4)  | 0.41               | 134 (55.1)<br>92 (37.9)<br>17 (7.0)   | 0.87               | 89.9                          |
| <i>TLR1</i>    | rs5743618    | G/G<br>G/T<br>T/T             | 92 (37.0)<br>114 (45.8)<br>43 (17.3) | 0.51               | 90 (33.6)<br>138 (51.5)<br>40 (14.9)  | 0.31               | 98.9                          |
| <i>TLR2</i>    | rs111200466  | ins/ins<br>ins/del<br>del/del | 173 (68.9)<br>68 (27.1)<br>10 (4.0)  | 0.38               | 190 (69.8)<br>74 (27.2)<br>8 (2.9)    | 0.83               | 100.0                         |
| <i>TLR10</i>   | rs11096957   | T/T<br>G/T<br>G/G             | 80 (31.9)<br>104 (41.4)<br>67 (26.7) | 0.0078             | 73 (27.3)<br>136 (50.9)<br>58 (21.7)  | 0.81               | 99.0                          |
| <i>SLC11A1</i> | rs2276631    | C/C<br>C/T<br>T/T             | 136 (56.7)<br>92 (38.3)<br>12 (5.0)  | 0.6                | 150 (56.2)<br>101 (37.8)<br>16 (6.0)  | 1                  | 96.9                          |
| <i>IL1B</i>    | rs1143643    | C/C<br>T/C<br>T/T             | 99 (40.6)<br>113 (46.3)<br>32 (13.1) | 1                  | 116 (43.5)<br>119 (44.6)<br>32 (12.0) | 0.89               | 97.7                          |
| <i>IL10</i>    | rs1800896    | T/T<br>T/C<br>C/C             | 75 (30.6)<br>121 (49.4)<br>49 (20.0) | 1                  | 59 (31.1)<br>92 (48.4)<br>39 (20.5)   | 0.77               | 83.2                          |

|              |           |                   |                                      |      |                                      |      |      |
|--------------|-----------|-------------------|--------------------------------------|------|--------------------------------------|------|------|
| <i>IFNG</i>  | rs2430561 | T/T<br>T/A<br>A/A | 78 (31.2)<br>112 (44.8)<br>60 (24.0) | 0.13 | 82 (30.6)<br>135 (50.4)<br>51 (19.0) | 0.80 | 99.0 |
| <i>TNF</i>   | rs1800629 | G/G<br>G/A<br>A/A | 184 (74.5)<br>58 (23.5)<br>5 (2.0)   | 0.79 | 223 (82.6)<br>45 (16.7)<br>2 (0.7)   | 1    | 98.9 |
| Males        |           |                   |                                      |      |                                      |      |      |
| <i>IRAK1</i> | rs1059703 | A<br>G            | 80 (80.8)<br>19 (19.2)               | NA   | 113 (75.8)<br>36 (24.2)              | NA   | 98.0 |
| <i>FOXP3</i> | rs2232365 | C<br>T            | 59 (59.6)<br>40 (40.4)               | NA   | 81 (54.4)<br>68 (45.6)               | NA   | 98.0 |
| Females      |           |                   |                                      |      |                                      |      |      |
| <i>IRAK1</i> | rs1059703 | A/A<br>G/A<br>G/G | 88 (59.5)<br>46 (31.1)<br>14 (9.5)   | 0.05 | 73 (60.8)<br>38 (31.7)<br>9 (7.5)    | 0.21 | 99.3 |
| <i>FOXP3</i> | rs2232365 | C/C<br>T/C<br>T/T | 42 (28.4)<br>75 (50.7)<br>31 (20.9)  | 0.87 | 41 (34.2)<br>59 (49.2)<br>20 (16.7)  | 1    | 99.3 |

HWE - Hardy-Weinberg equilibrium; NA – not applicable.
